# Supplementary material for: Adenovirus-mediated overexpression of bone morphogenetic protein-9 promotes methionine choline deficiency-induced non-alcoholic steatohepatitis in non-obese mice
Source: PubMed Central journal article supplement — Mol Med Rep. 2019 Jul 19;20(3):2743–53. doi: 10.3892/mmr.2019.10508 (PMC6691271; doi:10.3892/mmr.2019.10508), 2019-07-19
Supplement: Supplementary_Data.pdf [file Supplementary_Data.pdf]

Figure S1. Body weight in the mice fed the MCD diet. BMP-9 overexpressing and wild-type mice were fed either the control diet or the MCD diet for 4 weeks. The body weight of all mice was assessed over time (0-4 weeks). Data are expressed as the mean  $\pm$  standard error of the mean (n=6 mice in each group). BMP-9, bone morphogenetic protein-9; MCD, methionine- and choline- deficient diet; W, weeks; CD, control diet.

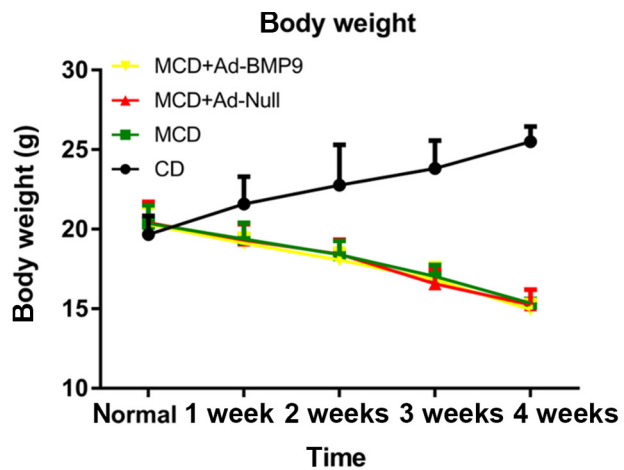

Table SI. Ingredients of the methionine- and choline-deficient diet.

| Ingredient                                            | Quantity,<br>g/kg |
|-------------------------------------------------------|-------------------|
| Sucrose                                               | 455.294           |
| Corn Starch                                           | 200.0             |
| Corn Oil                                              | 100.0             |
| Cellulose                                             | 30.0              |
| Mineral Mix, AIN-76(170915)                           | 35.0              |
| Calcium Phosphate, dibasic                            | 3.0               |
| L-Alanine                                             | 3.5               |
| L-Arginine HCl                                        | 12.1              |
| L-Asparagine                                          | 6.0               |
| L-Aspartic Acid                                       | 3.5               |
| L-Cystine                                             | 3.5               |
| L-Glutamic Acid                                       | 40.0              |
| Glycine                                               | 23.3              |
| L-Histidine HCl, monohydrate                          | 4.5               |
| L-Isoleucine                                          | 8.2               |
| L-Leucine                                             | 11.1              |
| L-Lysine HCl                                          | 18.0              |
| L-Phenylalanine                                       | 7.5               |
| L-Proline                                             | 3.5               |
| L-Serine                                              | 3.5               |
| L-Threonine                                           | 8.2               |
| L-Tryptophan                                          | 1.8               |
| L-Tyrosine                                            | 5.0               |
| L-Valine                                              | 8.2               |
| Vitamin Mix, w/o choline, A, D, E (83171)             | 5.0               |
| Vitamin E, DL- $\alpha$ tocopherol acetate (500 IU/g) | 0.242             |
| Vitamin A Palmitate (500,000 IU/g)                    | 0.0396            |
| Vitamin D3, cholecalciferol (500,000 IU/g)            | 0.0044            |
| Ethoxyquin, antioxidant                               | 0.02              |
